# Supplementary material for: Photochemical Organonitrate Formation in Wet Aerosols
Source: Copernicus journal article supplement (doi:10.5194/acp-2016-345), 2016-05-03
Supplement: Supplementary file 1 [file acp-2016-345-supplement.pdf]

## Supplementary Material

### Photochemical Organonitrate Formation in Wet Aerosol

Yong Bin Lim, Hwajin Kim, Jin Young Kim and Barbara J. Turpin

|           |           |
|-----------|-----------|
| Table S1  | Page S 2  |
| Table S2  | Page S 3  |
| Table S3  | Page S 4  |
| Scheme S1 | Page S 5  |
| Figure S1 | Page S 6  |
| Figure S2 | Page S 7  |
| Figure S3 | Page S 8  |
| Figure S4 | Page S 9  |
| Figure S5 | Page S 10 |
| Figure S6 | Page S 11 |
| Figure S7 | Page S 12 |

**Table S1.** Experimental Conditions

| No | Atomized Solution Date                                 | UV or Dark | RH <sub>i</sub> (%) | RH <sub>f</sub> (%) | T <sub>i</sub> (K) | T <sub>f</sub> (K) | [NO/NO <sub>x</sub> ] <sub>i</sub> (ppb) | [NO/NO <sub>x</sub> ] <sub>f</sub> (ppb) | [O <sub>3</sub> ] <sub>i</sub> (ppb) | [O <sub>3</sub> ] <sub>f</sub> (ppb) | ALW <sub>i</sub> (%) | ALW <sub>f</sub> (%) |
|----|--------------------------------------------------------|------------|---------------------|---------------------|--------------------|--------------------|------------------------------------------|------------------------------------------|--------------------------------------|--------------------------------------|----------------------|----------------------|
| 1  | AS + H <sub>2</sub> O <sub>2</sub> + Gly<br>3/5/2015   | UV         | 3.0                 | 3.0                 | 293                | 303                | 24.0/28.0                                | 5.5/25.5                                 | 0                                    | 24.9                                 | 1.2                  | 1.2                  |
| 2  | AS + H <sub>2</sub> O <sub>2</sub> + Gly<br>3/31/2015  | UV         | 3.0                 | 3.0                 | 294                | 309                | 8.2/9.4                                  | 4.4/15.6                                 | 6.9                                  | 7.7                                  | 1.2                  | 1.2                  |
| 3  | AS + H <sub>2</sub> O <sub>2</sub> + Gly<br>11/26/2015 | UV         | 3.0                 | 3.0                 | 292                | 306                | 2.4/2.9                                  | 0/1.1                                    | 9.6                                  | 34.0                                 | 1.2                  | 1.2                  |
| 4  | AS + H <sub>2</sub> O <sub>2</sub> + Gly<br>3/23/2015  | UV         | 70.8                | 38.9                | 294                | 304                | 5.1/6.4                                  | 0.4/4.6                                  | 7.4                                  | 11.3                                 | 45.8                 | 19.4                 |
| 5  | AS + H <sub>2</sub> O <sub>2</sub> + Gly<br>4/1/2015   | UV         | 82.2                | 42.0                | 295                | 310                | 7.2/10.5                                 | 2.7/7.4                                  | 6.9                                  | 15.4                                 | 59.2                 | 2.2                  |
| 6  | AS + Gly<br>5/27/2015                                  | UV*        | 69.4                | 34.8                | 298                | 310                | 54.7/55.5                                | 23.3/38.7                                | 13.0                                 | 18.0                                 | 44.3                 | 1.7                  |
| 7  | AS + H <sub>2</sub> O <sub>2</sub><br>3/30/2015        | UV         | 83.7                | 39.1                | 295                | 310                | 8.5/11.7                                 | 3.2/7.1                                  | 7.6                                  | 12.1                                 | 63.3                 | N/A                  |
| 8  | AS + H <sub>2</sub> O <sub>2</sub> + Gly<br>4/27/2015  | Dark       | 3.0                 | 3.0                 | 297                | 297                | 17.2/19.1                                | 17.2/19.1                                | 6.4                                  | 5.9                                  | 1.2                  | 1.2                  |
| 9  | AS + H <sub>2</sub> O <sub>2</sub> + Gly<br>4/28/2015  | Dark       | 77.7                | 56.2                | 298                | 298                | 38.9/39.9                                | 27.8/33.2                                | 6.2                                  | 7.8                                  | 53.7                 | 32.0                 |
| 10 | AS + H <sub>2</sub> O <sub>2</sub> + Gly<br>5/7/2015   | Dark       | 71.7                | 64.9                | 298                | 298                | 15.8/16.9                                | 15.6/17.1                                | 5.6                                  | 6.3                                  | 46.7                 | 39.8                 |
| 11 | SA + H <sub>2</sub> O <sub>2</sub> + Gly<br>3/9/2015   | UV         | 7.1                 | 3.0                 | 293                | 304                | 80.9/83.5                                | 41.6/77.7                                | 0                                    | 7.7                                  | 32.4                 | 26.5                 |
| 12 | SA + H <sub>2</sub> O <sub>2</sub> + Gly<br>3/25/2015  | UV         | 82.0                | 44.8                | 294                | 307                | 21.6/23.9                                | 15.2/19.7                                | 6.2                                  | 8.5                                  | 74.2                 | 53.1                 |
| 13 | SA + H <sub>2</sub> O <sub>2</sub> + Gly<br>5/6/2015   | Dark       | 5                   | 5                   | 298                | 298                | 15.8/16.9                                | 15.6/17.1                                | 5.6                                  | 6.3                                  | 26.9                 | 26.9                 |
| 14 | SA + H <sub>2</sub> O <sub>2</sub> + Gly<br>4/29/2015  | Dark       | 77.6                | 77.1                | 298                | 298                | 15.8/18.0                                | 15.7/17.5                                | 6.1                                  | 6.3                                  | 70.9                 | 70.6                 |

Note, AS = ammonium sulfate, SA = sulfuric acid, Gly = glyoxal, i = initial, f = final, ALW = fraction of aerosol liquid water in a wet aerosol, UV\* = 1-hour irradiation, and N/A = no aqueous phase

**Table S2.** Elemental compositions of organic-inorganic compounds analyzed by UPLC-HR-Q-TOF-MS in the positive mode

| Aerosols (Conditions) | m/z <sup>+</sup> | Elemental Composition | Compound               | Error (ppm) |
|-----------------------|------------------|-----------------------|------------------------|-------------|
| AS (Solution)         | 69.0509          | C3H5N2                | Imidazole*             | 89.4        |
|                       | 116.9984         | C2H6O4Na1             | Glyoxal                | -149.0      |
|                       | 133.0271         | C2H2N6Na1             | Imidazole              | 28.4        |
|                       | 248.0215         | C4H3N9O3Na1           | Imine                  | -14.5       |
|                       | 363.0174         | C4H12N4O14Na1         | Imine                  | -18.8       |
| AS (Dry)              | 89.0307 (z = 2)  | C10H10O3              | Organic Compound       | -2.8        |
|                       | 133.0920 (z = 2) | C16H26O3              | Organic Compound       | -11.6       |
|                       | 161.0986         | C11H13O1              | Organic Compound       | 15.6        |
|                       | 203.0880         | C9H15O5               | Organic Compound       | -16.7       |
|                       | 283.1749         | C11H24N4O3            | Organic Compound       | 3.0         |
|                       | 365.1519         | C12H26N2O9Na1         | Imine                  | -3.2        |
|                       | 381.2726         | C19H38N2O4Na1         | Imine                  | 0.6         |
| AS (Humid)            | 107.9721 (z = 2) | C4H109Na1             | Unidentified Peak      | -30.2       |
|                       | 133.0865         | C6H13O3               | Organic Compound       | 4.4         |
|                       | 161.1082         | C8H14N2Na1            | Imidazole              | 9.6         |
|                       | 203.1023         | C7H12N6Na1            | Imidazole              | 3.6         |
|                       | 261.1322         | C7H14N10Na1           | Imidazole              | 5.1         |
|                       | 283.1749         | C7H20N10O1            | Imine                  | 12.4        |
|                       | 363.0483         | C15H4N10O1Na1         | Imine                  | 5.8         |
|                       | 381.2626         | C20H38O5Na1           | Organic Compound       | 3.8         |
|                       | 399.2664         | C12H32N10Na1          | Imidazole              | -9.9        |
|                       | 441.9170         | C13N1O17              | Imine                  | 2.1         |
| 526.9000              | C12N4O19         | Imine                 | -9.3                   |             |
| SA (Solution)         | 93.0210          | C2H5O4                | Organic Compound       | 29.7        |
|                       | 117.0562         | C5H9O3                | Organic Compound       | 13.5        |
|                       | 149.0307         | C6H6O3                | Organic Compound       | 65.7        |
|                       | 172.9890         | C4H6O6Na1             | Organic Compound       | -96.3       |
|                       | 252.9581         | C7H2O9Na1             | Organic Compound       | -4.0        |
|                       | 277.1795         | C15H26O3Na1           | Organic Compound       | 7.5         |
|                       | 303.2102         | C16H31O5              | Organic Compound       | -21.1       |
| SA (Dry)              | 135.0011         | C5H4O3                | Organic Compound       | -30.9       |
|                       | 261.1178         | C15H17O4              | Organic Compound       | 21.7        |
|                       | 305.1588         | C14H25O7              | Organic Compound       | -2.2        |
|                       | 331.1749         | C16H27O7              | Organic Compound       | -0.7        |
|                       | 349.1742         | C14H30O8              | Organic Compound       | -26.0       |
|                       | 393.2035         | C16H34O9              | Organic Compound       | -15.3       |
| SA (Humid)            | 89.0297 (z = 2)  | C10H10O3              | Organic Compound       | -14.0       |
|                       | 107.9653 (z = 2) | C4H109Na1             | Organic Peroxide       | -93.2       |
|                       | 133.0918 (z = 2) | C16H26O3              | Organic Compound       | -13.1       |
|                       | 161.0954         | C11H13O1              | Organic Compound       | -4.3        |
|                       | 203.1078         | C9H15O5               | Organic Compound       | -16.7       |
|                       | 239.1504         | C10H23O6              | Organic Compound       | 6.2         |
|                       | 261.1323         | C10H22O6Na1           | Organic Compound       | 5.5         |
|                       | 283.1720         | C12H27O7              | Organic Compound       | -11.1       |
|                       | 305.1557         | C12H26O7Na1           | Organic Compound       | -4.5        |
|                       | 327.1983         | C14H31O8              | Organic Compound       | -9.3        |
|                       | 435.8400         | C3H2N1O18S3           | Organonitrogen-sulfate | -6.5        |

\*Kampf et al., 2012

**Table S3.** Added reactions to the full kinetic model (Lim and Turpin, 2015 Supplementary Material)

|    | Reactions                          | Rate constants<br>( $M^{1-n} s^{-1}$ )                | Ref    |
|----|------------------------------------|-------------------------------------------------------|--------|
| 1  | $GLY_g \leftrightarrow GLY$        | $K_{eq} = 2e7$<br>$k_r = 1e5$                         | (1, 2) |
| 2  | $GLYAC_g \leftrightarrow GLYAC$    | $K_{eq} = 9.12e3$<br>$k_r = 1e5$                      | (2, 3) |
| 3  | $OXLAC_g \leftrightarrow OXLAC$    | $K_{eq} = 3.26e6$<br>$k_r = 1e5$                      | (2, 3) |
| 4  | $HCO_2H_g \leftrightarrow HCO_2H$  | $K_{eq} = 3.55e3$<br>$k_r = 4.6e5$                    | (2, 3) |
| 5  | $HCHO_g \leftrightarrow HCHO$      | $K_{eq} = 3.3e3$<br>$k_r = 4.6e5$                     | (2, 3) |
| 6  | $GCOLAC_g \leftrightarrow GCOLAC$  | $K_{eq} = 1.18e4$<br>$k_r = 1e5$                      | (2, 3) |
| 7  | $H_2O_{2g} \leftrightarrow H_2O_2$ | $K_{eq} = 1e5$<br>$k_r = 1e6$                         | (2, 3) |
|    | Gas-Phase Reactions                | Rate constants<br>( $[molecules/cm^3]^{1-n} s^{-1}$ ) | Ref    |
| 8  | $GLY_g + OH_g \rightarrow$         | $9.7e-12$                                             | (4)    |
| 9  | $HCO_2H_g + OH_g \rightarrow$      | $4.5e-13$                                             | (4)    |
| 10 | $HCHO_g + OH_g \rightarrow$        | $8.5e-12$                                             | (4)    |
| 11 | $GLYAC_g + OH_g \rightarrow$       | $6.2e-11$                                             | (5)    |
| 12 | $OXLAC_g + OH_g \rightarrow$       | $2e-13$                                               | (5)    |
| 13 | $GCOLAC_g + OH_g \rightarrow$      | $2.96e-13$                                            | (5)    |
| 14 | $H_2O_2 \rightarrow 2OH$           | $3.77e-6$                                             | (3)    |

GLY = glyoxal; GLYAC = glyoxylic acid, OXLAC = oxalic acid;  $HCO_2H$  = formic acid; GCOLAC = glycolic acid; HCHO = formaldehyde;  $H_2O_2$  = hydrogen peroxide

#### Reference

1. Ervens B & Volkamer R (2010) Glyoxal processing by aerosol multiphase chemistry: towards a kinetic modeling framework of secondary organic aerosol formation in aqueous particles. *Atmos. Chem. Phys.* 10(17):8219-8244.
2. Warneck P (1999) The relative importance of various pathways for the oxidation of sulfur dioxide and nitrogen dioxide in sunlit continental fair weather clouds. *PCCP* 1(24):5471-5483.
3. Lim HJ, Carlton AG, & Turpin BJ (2005) Isoprene forms secondary organic aerosol through cloud processing: Model simulations. *Environ. Sci. Technol.* 39(12):4441-4446.
4. Atkinson R & Arey J (2003) Atmospheric degradation of volatile organic compounds. *Chem. Rev.* 103(12):4605-4638.
5. Kwok ESC & Atkinson R (1995) Estimation of Hydroxyl Radical Reaction-Rate Constants for Gas-Phase Organic-Compounds Using a Structure-Reactivity Relationship - an Update. *Atmos. Environ.* 29(14):1685-1695.

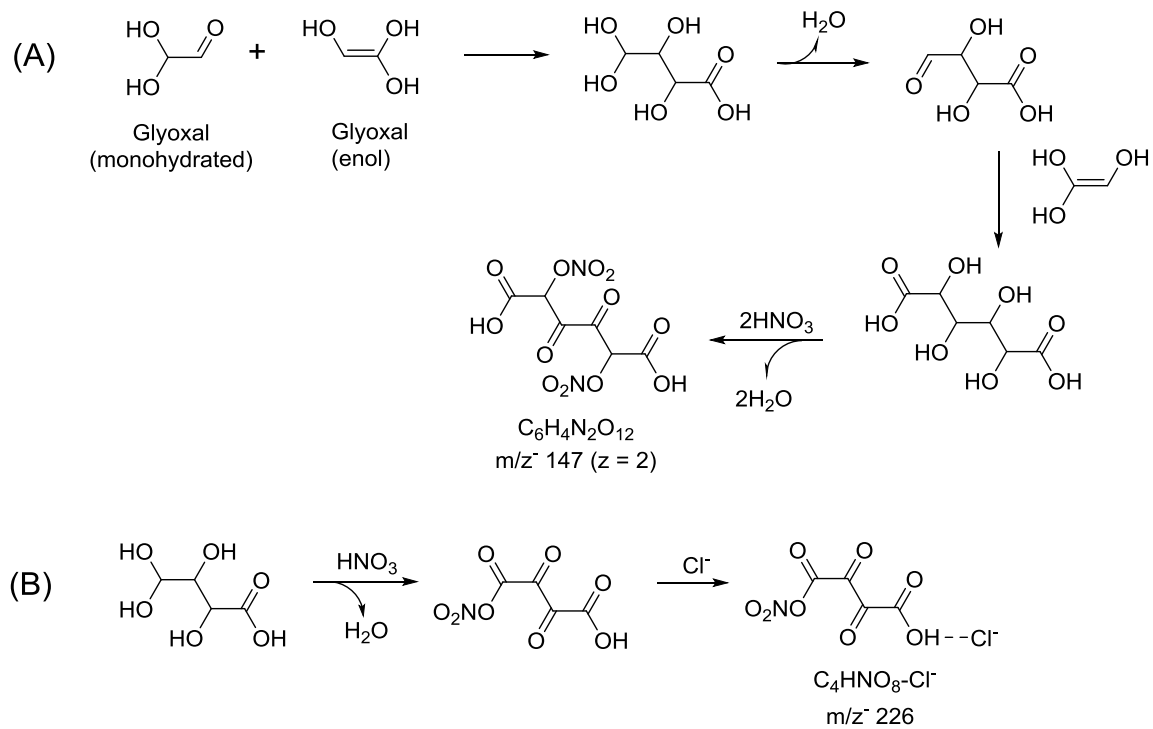

**Scheme S1.** Proposed formation of two organonitrates,  $m/z^- 147$  (A) and  $m/z^- 226$  (B)

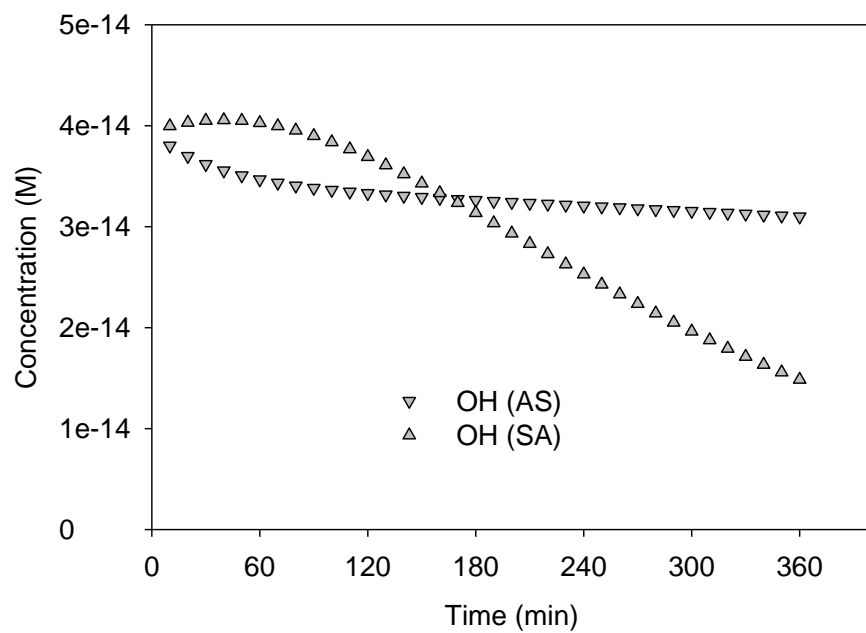

**Fig. S1.** The simulated concentrations of OH in ammonium sulfate aerosols (AS) and sulfuric acid aerosols (SA)

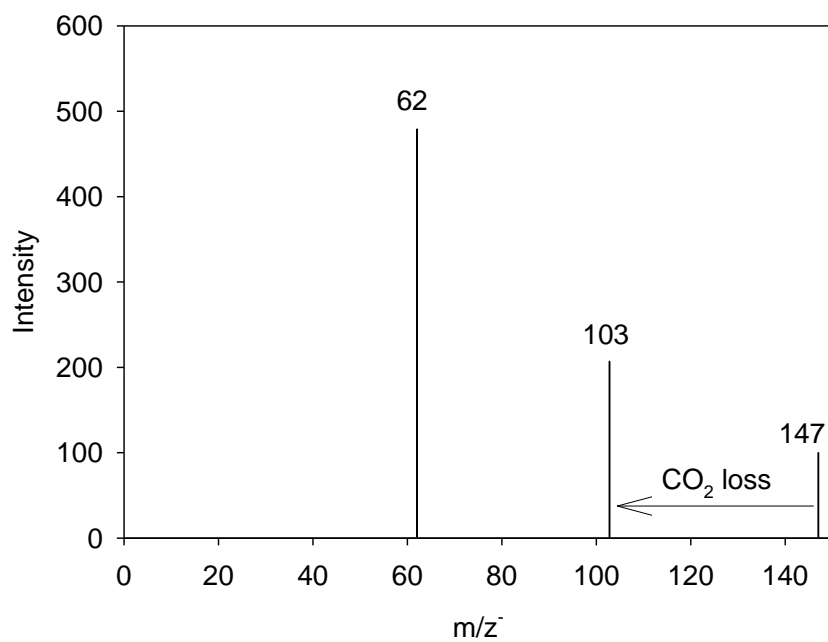

**Figure S2.** LC-MS/MS analysis for m/z<sup>-</sup> 147 from smog chamber AS aerosols

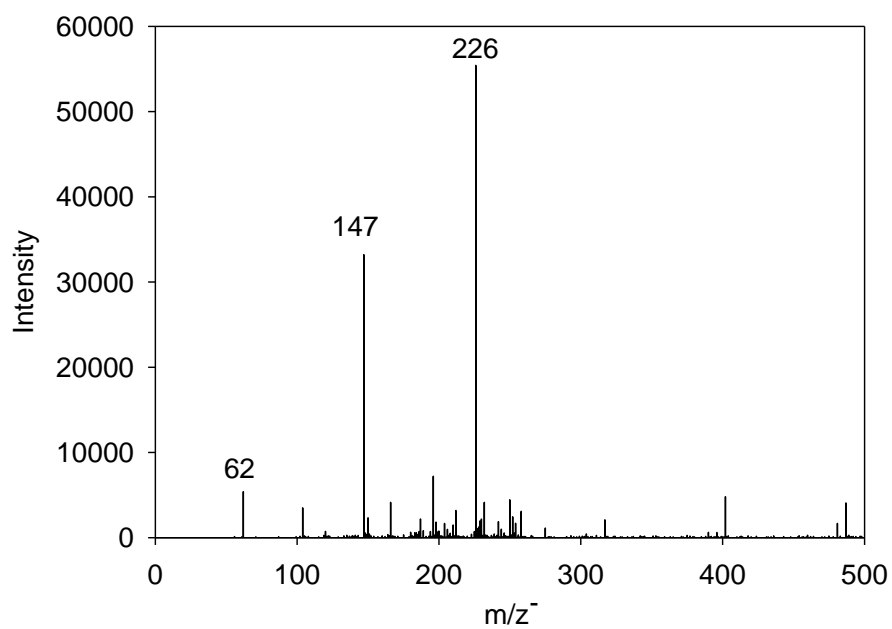

**Figure S3.** The mass spectrum for the mixture solution of glyoxal (7.6 mM) and nitric acid (15 mM) in the negative mode



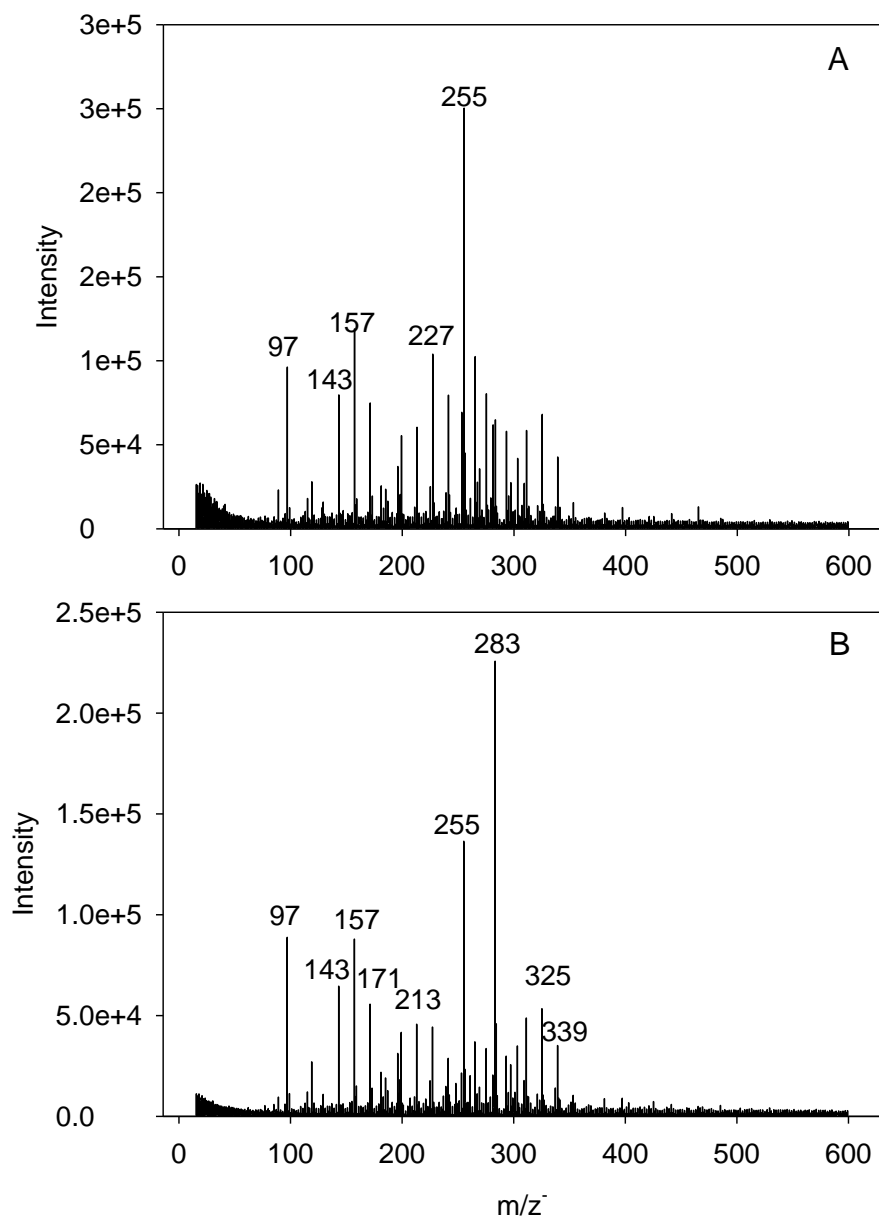

**Figure S4.** Negative-mode mass spectra for 3 hour dark reactions of glyoxal- $H_2O_2$ - $(NH_4)_2SO_4$  aerosols (A) and glyoxal- $H_2O_2$ - $H_2SO_4$  aerosols (B) under humid conditions ( $> 70\%$  RH)

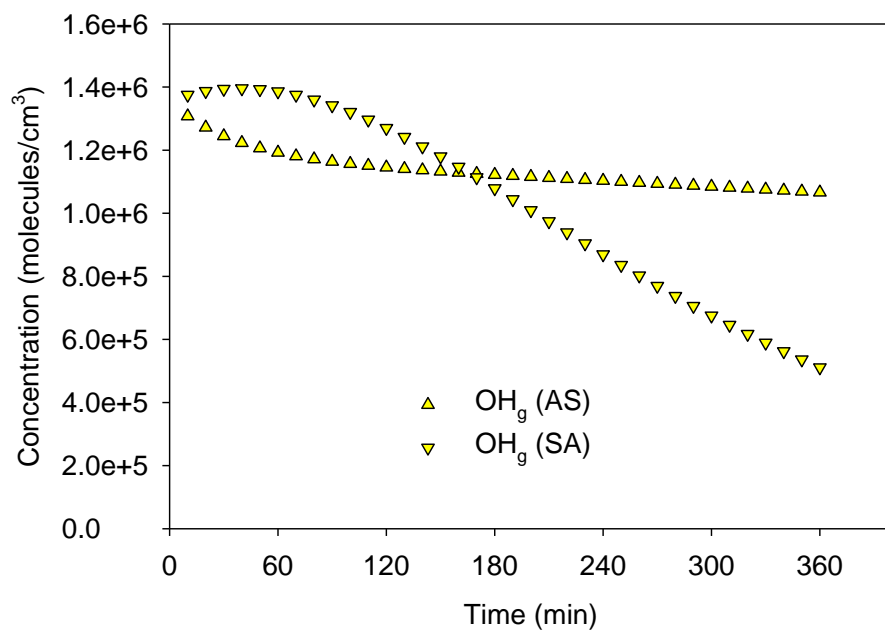

**Fig. S5.** The simulated gas-phase OH concentrations during photochemical reactions of AS aerosols (AS) and SA aerosols (SA)

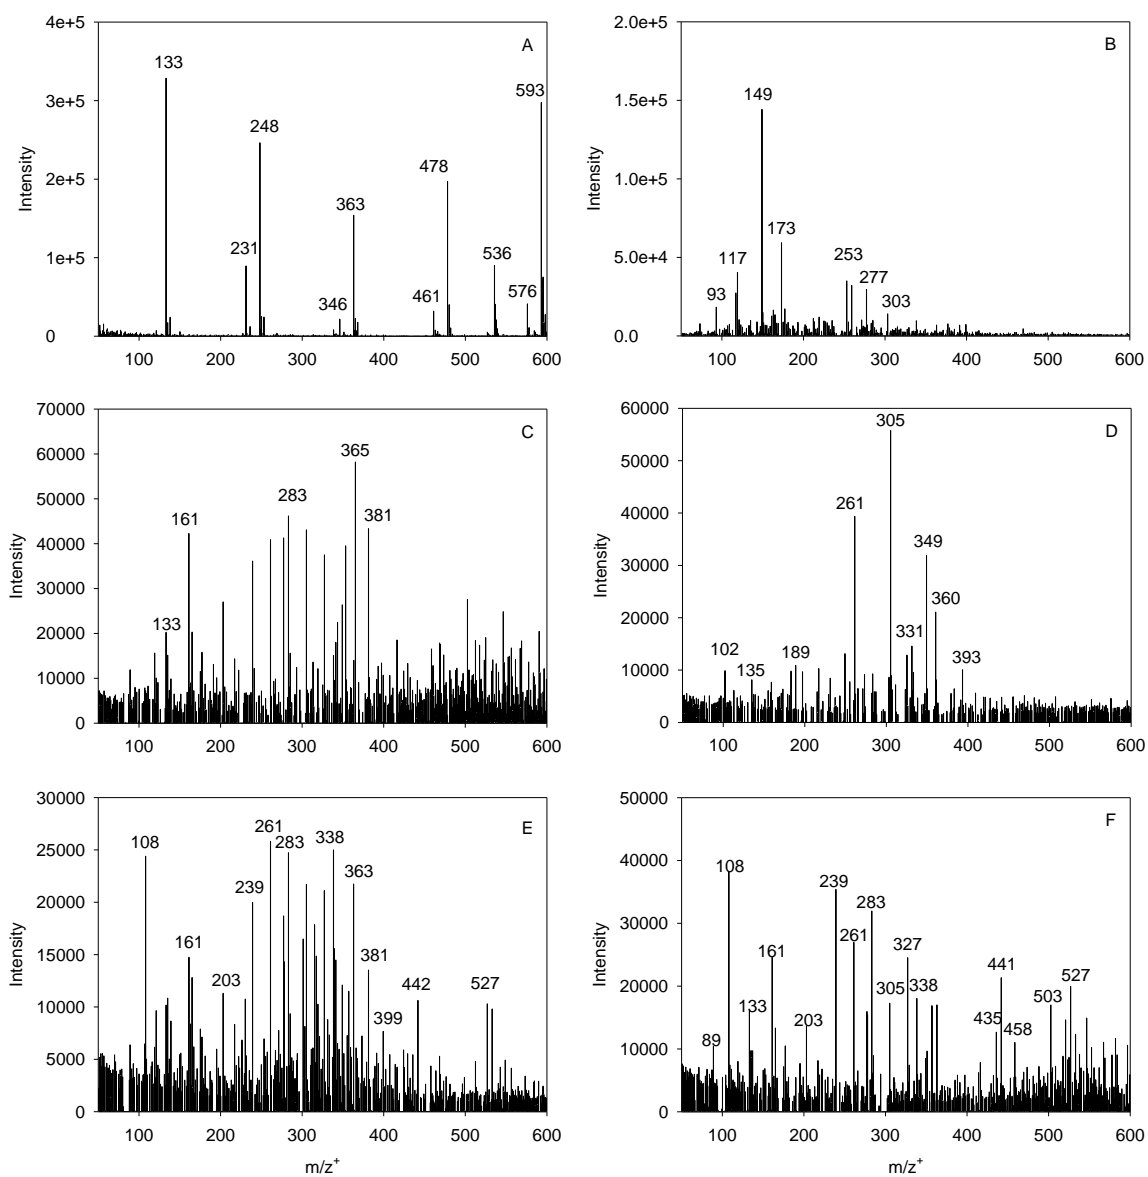

**Fig. S6.** Positive-mode mass spectra of dark reactions of glyoxal- $H_2O_2$ - $(NH_4)_2SO_4$  (A, C and E) and glyoxal- $H_2O_2$ - $H_2SO_4$  (B, D and F). A and B are solutions. C and D are dry aerosols and E and F are humid aerosols at time = 0 min

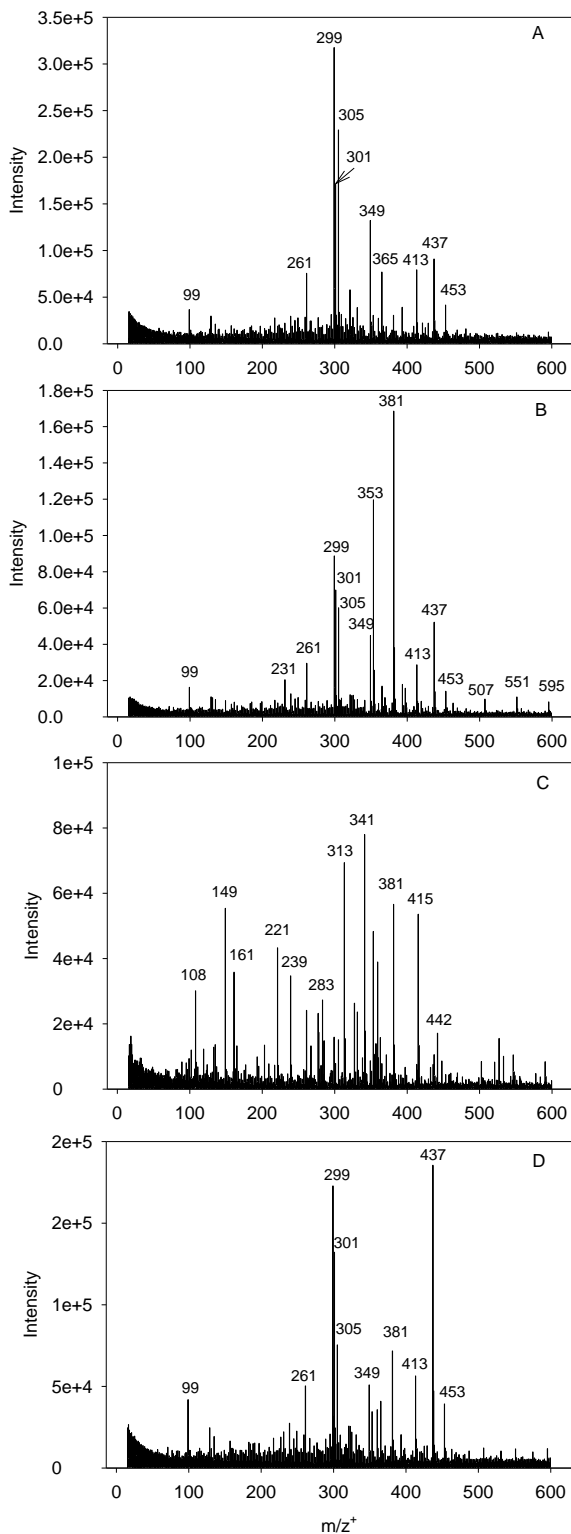

**Fig. S7.** Negative-mode mass spectra for 3 dark-reacted AS aerosols (A) and SA aerosols (B) in the humid chamber, and AS aerosols (C) and SA aerosols (D) in the dry chamber
